# Supplementary material for: Facile preparation of versatile gadolinium-chelated protein nanocomposite for T1 magnetic resonance imaging-guided photodynamic and photothermal synergetic therapy
Source: Royal Society of Chemistry journal article supplement (doi:10.1039/c8tb00148k), 2018-01-01
Supplement: c8tb00148k1.pdf [file c8tb00148k1.pdf]

## Supporting Information

### Facile preparation of versatile Gadolinium-chelated protein nanocomposite for T1 magnetic resonance imaging guided photodynamic and photothermal synergetic therapy

Pei Liu,<sup>‡a</sup> Hongyi Zheng,<sup>‡b,c</sup> Zhe Yang,<sup>a</sup> Li Ba,<sup>b</sup> Wei Zhu,<sup>a</sup> Leping Lin,<sup>a</sup> Yuxuan Xiong,<sup>a</sup> Zushun Xu<sup>\*a</sup> and Jinghua Ren<sup>\*b</sup>

<sup>a</sup> Hubei Collaborative Innovation Center for Advanced Organic Chemical Materials; Ministry of Education Key Laboratory for the Green Preparation and Application of Functional Materials, Hubei University, Wuhan, Hubei 430062, China

<sup>b</sup> Cancer Center, Union Hospital, Tongji Medical College of Huazhong University of Science and Technology, Wuhan, Hubei 430030, China.

<sup>c</sup> The First Clinical Medical college of Gannan Medical University, Ganzhou, 341000, China.

\* Corresponding author.

\*\* Corresponding author.

E-mail addresses: zushunxu@hubu.edu.cn (Z. Xu), jhrenmed@hust.edu.cn (J. Ren)

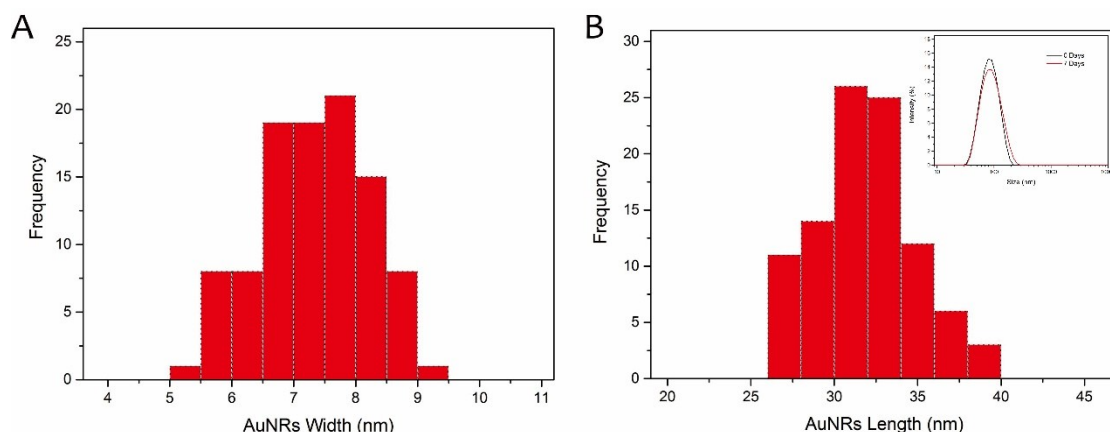

Figure S1. Width (A) and Length (B) distributions of 100 GNRs counted

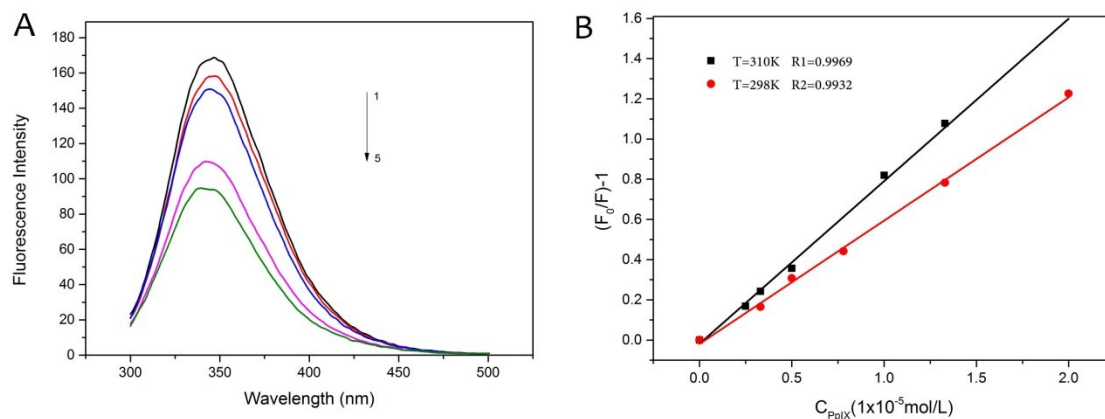

Figure S2. (A) Fluorescence emission spectra of BSA in the presence of PpIX. (B) Stern-Volmer plots for the interaction of BSA with PpIX at different temperature.

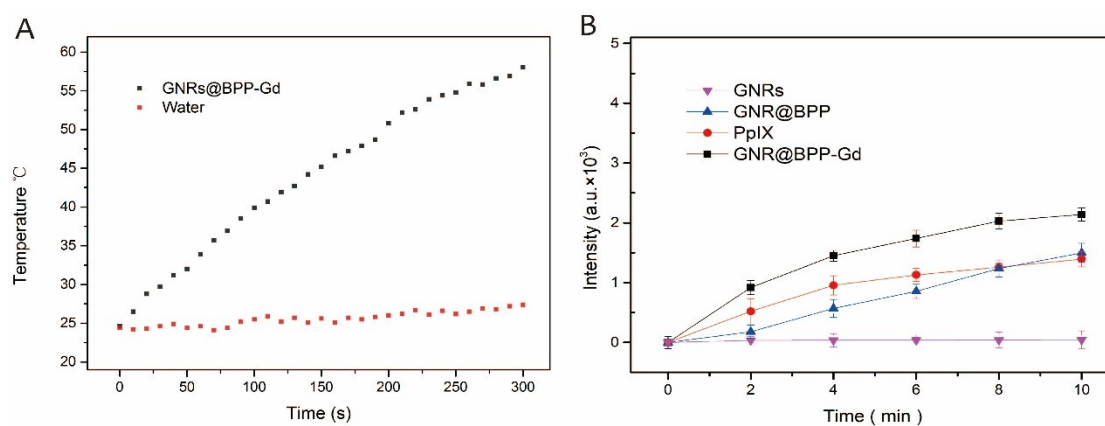

Figure S3. (A) The elevation of temperature between GNRs@BPP-Gd and water. (B) The fluorescence intensity of each group at the presence of DCFH

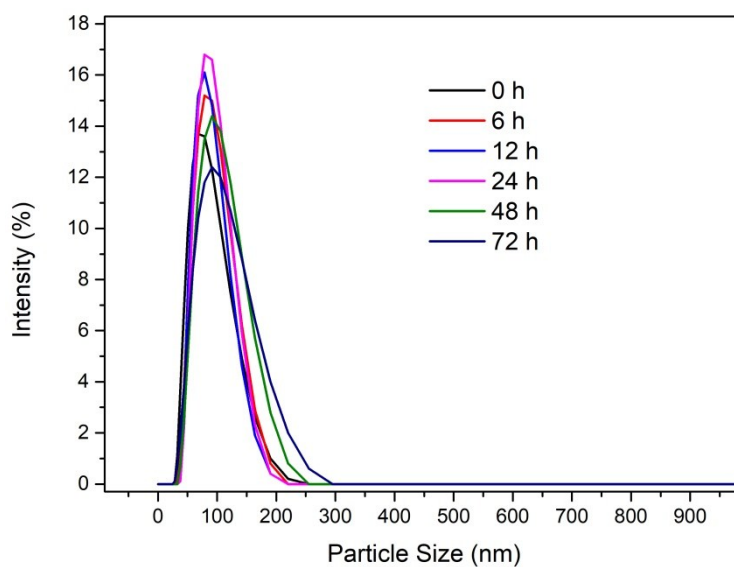

Figure S4. Hydrodynamic size of GNR@BPP-Gd incubated in MEM containing 10% fetal bovine serum at different times.

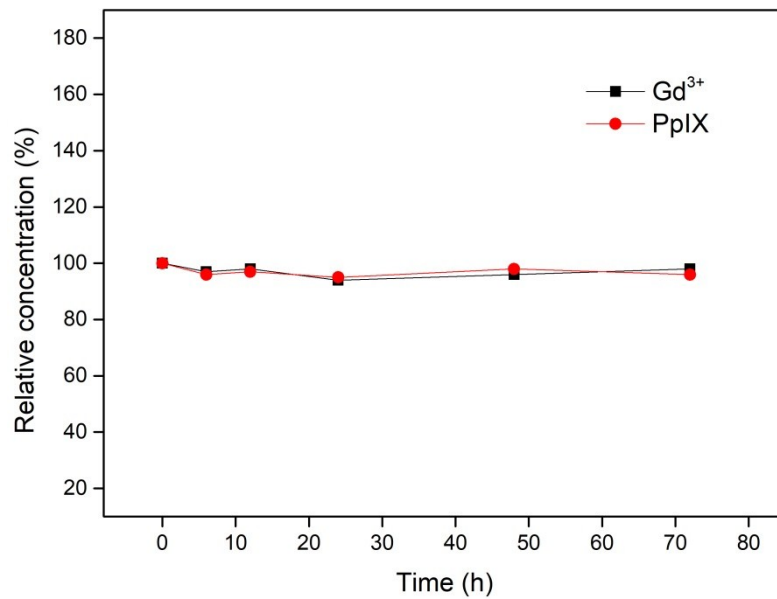

Figure S5. The stability of PpIX and Gd in GNRs@BPP-Gd nanoplatform. The concentration of Gd<sup>3+</sup> was evaluated by ICP and the concentration of PpIX was indirect determined by measuring the absorption at 660 nm.

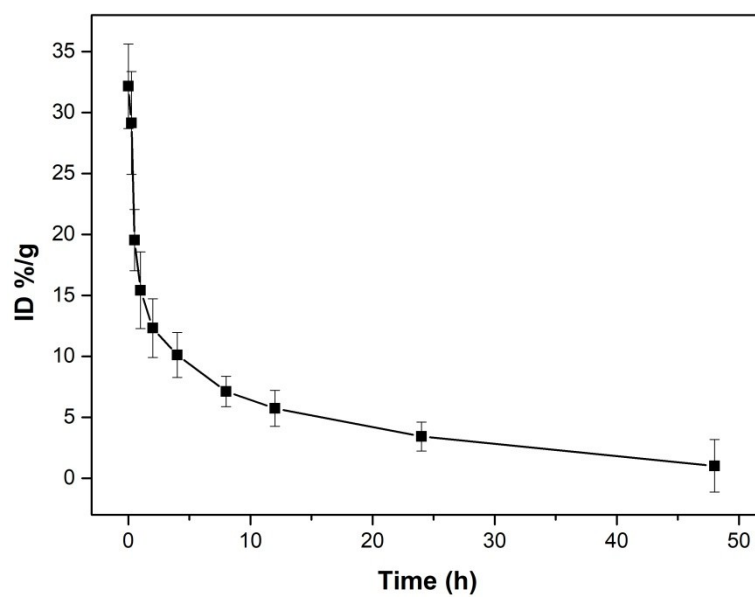

Figure S6. Blood circulation curve of GNRs@BPP-Gd
